# Supplementary material for: Widespread position-specific conservation of synonymous rare codons within coding sequences
Source: PubMed Central journal article supplement (PMC5438181; doi:10.1371/journal.pcbi.1005531), 2017-05-05
Supplement: pcbi.1005531.s002.pdf [file pcbi.1005531.s002.pdf]

| <b>ID</b> | <b>species</b>                                          |
|-----------|---------------------------------------------------------|
| Aaeo      | <i>Aquifex aeolicus</i> VF5                             |
| Bant      | <i>Bacillus anthracis</i> str. Ames                     |
| Bbur      | <i>Borrelia burgdorferi</i> ZS7                         |
| Bfra      | <i>Bacteroides fragilis</i> YCH46                       |
| Bmel      | <i>Brucella melitensis</i> bv. 1 str. 16M               |
| Bper      | <i>Bordetella pertussis</i> Tohama I                    |
| Cbur      | <i>Coxiella burnetii</i> RSA 493                        |
| Cjej      | <i>Campylobacter jejuni</i> subsp. <i>jejuni</i> 81-176 |
| Ctep      | <i>Chlorobium tepidum</i> TLS                           |
| Dalk      | <i>Desulfurivibrio alkaliphilus</i> AHT2                |
| Drad      | <i>Deinococcus radiodurans</i> R1                       |
| Ecol      | <i>Escherichia coli</i> str. K-12 substr. MG1655        |
| Hpyl      | <i>Helicobacter pylori</i> 26695                        |
| Mtub      | <i>Mycobacterium tuberculosis</i> CDC1551               |
| Nmen      | <i>Neisseria meningitidis</i> MC58                      |
| Nsp       | <i>Nostoc</i> sp. PCC 7120                              |
| Pflu      | <i>Pseudomonas protegens</i> Pf-5                       |
| Rmet      | <i>Cupriavidus metallidurans</i> CH34                   |
| Saur      | <i>Staphylococcus aureus</i> subsp. <i>aureus</i> N315  |
| Spne      | <i>Streptococcus pneumoniae</i> CGSP14                  |
| Tmar      | <i>Thermotoga maritima</i> MSB8                         |
| Tthe      | <i>Thermus thermophilus</i> HB27                        |
| Xfas      | <i>Xylella fastidiosa</i> Temecula1                     |
| Ypes      | <i>Yersinia pestis</i> KIM10+                           |

**Table S1.** Bacterial species used in this study.
