# Supplementary material for: Widespread position-specific conservation of synonymous rare codons within coding sequences
Source: PubMed Central journal article supplement (PMC5438181; doi:10.1371/journal.pcbi.1005531), 2017-05-05
Supplement: pcbi.1005531.s003.pdf [file pcbi.1005531.s003.pdf]

| <b>ID</b> | <b>species</b>                                 |
|-----------|------------------------------------------------|
| Aboo      | <i>Aciduliprofundum boonei</i> T469            |
| Aful      | <i>Archaeoglobus fulgidus</i> DSM 4304         |
| Asac      | <i>Acidilobus saccharovorans</i> 345-15        |
| CKor      | <i>Candidatus Korarchaeum cryptofilum</i> OPF8 |
| Dkam      | <i>Desulfurococcus kamchatkensis</i> 1221n     |
| Hbut      | <i>Hyperthermus butylicus</i> DSM 5456         |
| Hjeo      | <i>Halalkalicoccus jeotgali</i> B3             |
| Hsal      | <i>Halobacterium salinarum</i> R1              |
| Hvol      | <i>Haloferax volcanii</i> DS2                  |
| Meve      | <i>Methanohalobium evestigatum</i> Z-7303      |
| Mfer      | <i>Methanothermus fervidus</i> DSM 2088        |
| Mhun      | <i>Methanospirillum hungatei</i> JF-1          |
| Mkan      | <i>Methanopyrus kandleri</i> AV19              |
| Mlab      | <i>Methanocorpusculum labreanum</i> Z          |
| Mmar      | <i>Methanococcus maripaludis</i> S2            |
| Msed      | <i>Metallosphaera sedula</i> DSM 5348          |
| Msta      | <i>Methanosphaera stadtmanae</i> DSM 3091      |
| Mthe      | <i>Methanosaeta thermophila</i> PT             |
| Nequ      | <i>Nanoarchaeum equitans</i> Kin4-M            |
| Nmar      | <i>Nitrosopumilus maritimus</i> SCM1           |
| Pars      | <i>Pyrobaculum arsenaticum</i> DSM 13514       |
| Ptor      | <i>Picrophilus torridus</i> DSM 9790           |
| Ssol      | <i>Sulfolobus solfataricus</i> P2              |
| Taci      | <i>Thermoplasma acidophilum</i> DSM 1728       |
| Tbar      | <i>Thermococcus barophilus</i> MP              |
| Tpen      | <i>Thermofilum pendens</i> Hrk 5               |

**Table S2.** Archaeal species used in this study.
