# Supplementary material for: Widespread position-specific conservation of synonymous rare codons within coding sequences
Source: PubMed Central journal article supplement (PMC5438181; doi:10.1371/journal.pcbi.1005531), 2017-05-05
Supplement: pcbi.1005531.s004.pdf [file pcbi.1005531.s004.pdf]

| <b>ID</b> | <b>species</b>                                              | <b>common name</b> |
|-----------|-------------------------------------------------------------|--------------------|
| Afum      | <i>Aspergillus fumigatus</i> Af293                          |                    |
| Agam      | <i>Anopheles gambiae</i>                                    | mosquito           |
| Amel      | <i>Apis mellifera</i> strain DH4                            | bee                |
| Atha      | <i>Arabidopsis thaliana</i>                                 |                    |
| Bmal      | <i>Brugia malayi</i>                                        |                    |
| Cele      | <i>Caenorhabditis elegans</i>                               | worm               |
| Cneo      | <i>Cryptococcus neoformans</i> var. <i>neoformans</i> JEC21 |                    |
| Crei      | <i>Chlamydomonas reinhardtii</i>                            |                    |
| Ddis      | <i>Dictyostelium discoideum</i> AX4                         |                    |
| Dmel      | <i>Drosophila melanogaster</i>                              | fly                |
| Drer      | <i>Danio rerio</i>                                          | zebrafish          |
| Ecun      | <i>Encephalitozoon cuniculi</i> GB-M1                       |                    |
| Ehis      | <i>Entamoeba histolytica</i> HM-1:IMSS                      |                    |
| Ggal      | <i>Gallus gallus</i>                                        | chicken            |
| Glam      | <i>Giardia lamblia</i> ATCC 50803                           |                    |
| Hsap      | <i>Homo sapiens</i>                                         | human              |
| Isca      | <i>Ixodes scapularis</i>                                    | tick               |
| Lmaj      | <i>Leishmania major</i> strain Friedlin                     |                    |
| Mmus      | <i>Mus musculus</i>                                         | mouse              |
| Oana      | <i>Ornithorhynchus anatinus</i>                             | platyus            |
| Pfal      | <i>Plasmodium falciparum</i> 3D7                            |                    |
| Scer      | <i>Saccharomyces cerevisiae</i> S288c                       | yeast              |
| Spur      | <i>Strongylocentrotus purpuratus</i>                        | urchin             |
| Tbru      | <i>Trypanosoma brucei gambiense</i> DAL972                  |                    |
| Tpar      | <i>Theileria parva</i> strain Muguga                        |                    |
| Xtro      | <i>Xenopus (Silurana) tropicalis</i>                        | frog               |

**Table S3.** Eukaryotic species used in this study.
